# Supplementary material for: The Role of RKIP in the Regulation of EMT in the Tumor Microenvironment
Source: MDPI journal article supplement (doi:10.3390/cancers14194596), 2022-09-22
Supplement: s1 [file s1]

## Supplementary Materials

Gene expression ( $\log_2(\text{TPM})$ ) of the genes PEBP1 (RKIP), SNAI1 (SNAIL), VIM, CDH1 (E-Cadherin), CDH2 (N-Cadherin), EPCAM, LAMA1 and LAMB1, across 22 different types of cancer in the Cancer Genome Atlas (TCGA). BLCA, Bladder Urothelial Carcinoma; BRCA, Breast invasive carcinoma; CESC, Cervical squamous cell carcinoma and endocervical adenocarcinoma; CHOL, Cholangiocarcinoma; COAD, Colon adenocarcinoma; ESCA, Esophageal carcinoma; HNSC, Head and Neck squamous cell carcinoma; KICH, Kidney Chromophobe; KIRC, Kidney renal clear cell carcinoma; KIRP, Kidney renal papillary cell carcinoma; LIHC, Liver hepatocellular carcinoma; LUAD, Lung adenocarcinoma; LUSC, Lung squamous cell carcinoma; PAAD, Pancreatic adenocarcinoma; PCPG, Pheochromocytoma and Paraganglioma; PRAD, Prostate adenocarcinoma; READ, Rectum adenocarcinoma; SARC, Sarcoma; SKCM, Skin Cutaneous Melanoma; STAD, Stomach adenocarcinoma; THCA, Thyroid carcinoma; THYM, Thymoma; UCEC. Pair-wise Pearson's correlation between PEBP1 and each of the biomarkers (SNAI1, VIM, CDH1, CDH2, EPCAM, LAMA1 and LAMB1) were across for each of the 22 different types of cancer and their normal tissues in the TCGA. Significance is listed for each cancer type, for each biomarker with PEBP1.

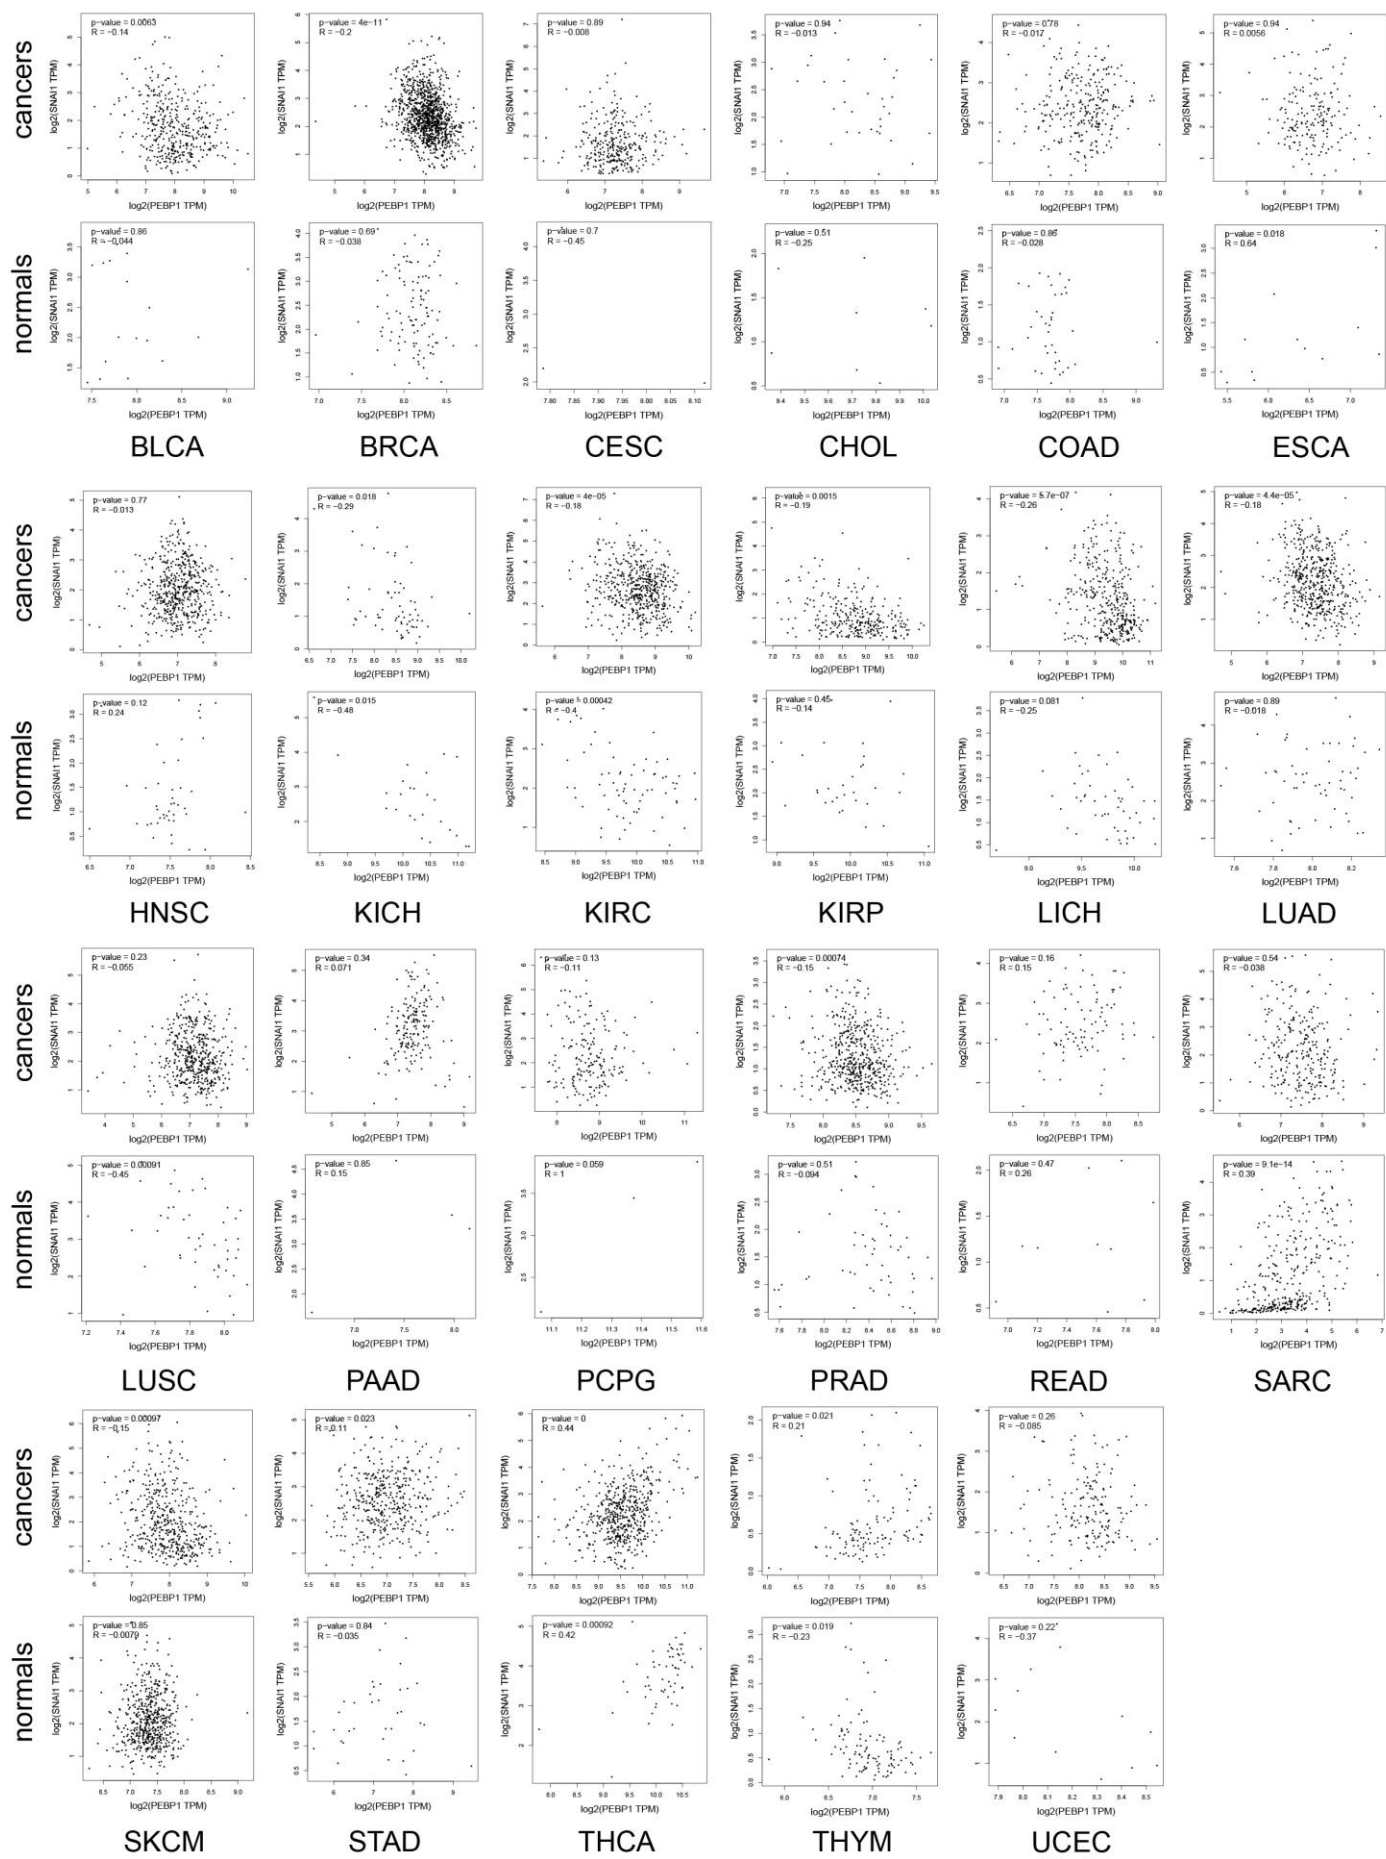

### **Supplementary Figure S1. RKIP vs SNAI1 across normal and cancerous tissues.**

Gene expression ( $\log_2(\text{TPM})$ ) of the genes PEBP1 (RKIP), SNAI1 (SNAIL), VIM, CDH1 (E-Cadherin), CDH2 (N-Cadherin), EPCAM, LAMA1 and LAMB1, across 22 different types of cancer in the Cancer Genome Atlas (TCGA). BLCA, Bladder Urothelial Carcinoma; BRCA, Breast invasive carcinoma; CESC, Cervical squamous cell carcinoma and endocervical adenocarcinoma; CHOL, Cholangiocarcinoma; COAD, Colon adenocarcinoma; ESCA, Esophageal carcinoma; HNSC, Head and Neck squamous cell carcinoma; KICH, Kidney Chromophobe; KIRC, Kidney renal clear cell carcinoma; KIRP, Kidney renal papillary cell carcinoma; LIHC, Liver hepatocellular carcinoma; LUAD, Lung adenocarcinoma; LUSC, Lung squamous cell carcinoma; PAAD, Pancreatic adenocarcinoma; PCPG, Pheochromocytoma and Paraganglioma; PRAD, Prostate adenocarcinoma; READ, Rectum adenocarcinoma; SARC, Sarcoma; SKCM, Skin Cutaneous Melanoma; STAD, Stomach adenocarcinoma; THCA, Thyroid carcinoma; THYM, Thymoma; UCEC. Pair-wise Pearson's correlation between PEBP1 and SNAI1 were across for each of the 22 different types of cancer and their normal tissues in the TCGA. Significance is listed for each cancer type, for each biomarker with PEBP1.

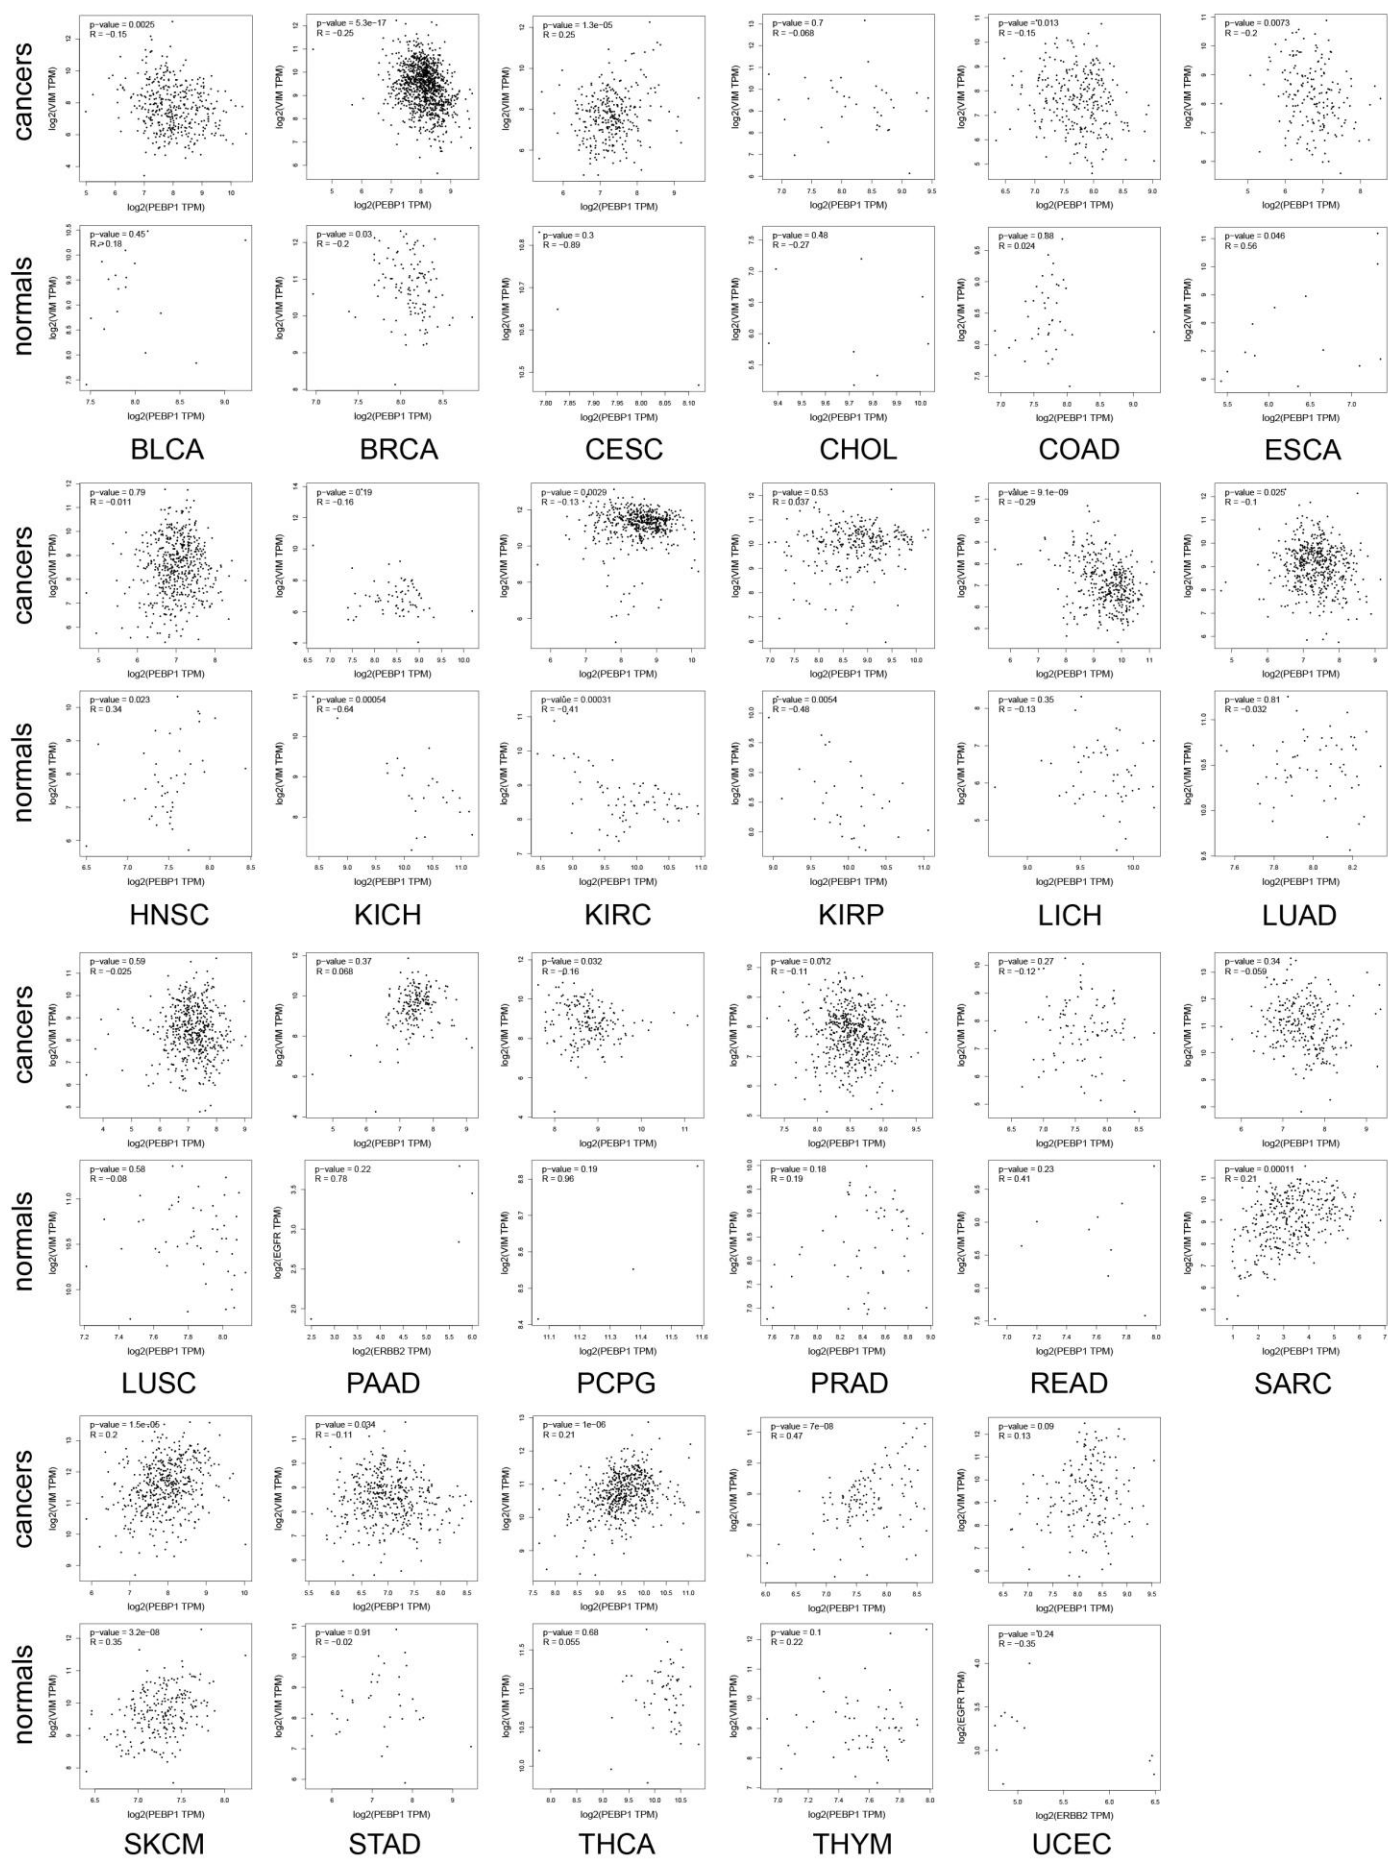

### **Supplementary Figure S2. RKIP vs VIM across normal and cancerous tissues.**

Gene expression ( $\log_2(\text{TPM})$ ) of the genes PEBP1 (RKIP), SNAIL1 (SNAIL), VIM, CDH1 (E-Cadherin), CDH2 (N-Cadherin), EPCAM, LAMA1 and LAMB1, across 22 different types of cancer in the Cancer Genome Atlas (TCGA). BLCA, Bladder Urothelial Carcinoma; BRCA, Breast invasive carcinoma; CESC, Cervical squamous cell carcinoma and endocervical adenocarcinoma; CHOL, Cholangiocarcinoma; COAD, Colon adenocarcinoma; ESCA, Esophageal carcinoma; HNSC, Head and Neck squamous cell carcinoma; KICH, Kidney Chromophobe; KIRC, Kidney renal clear cell carcinoma; KIRP, Kidney renal papillary cell carcinoma; LIHC, Liver hepatocellular carcinoma; LUAD, Lung adenocarcinoma; LUSC, Lung squamous cell carcinoma; PAAD, Pancreatic adenocarcinoma; PCPG, Pheochromocytoma and Paraganglioma; PRAD, Prostate adenocarcinoma; READ, Rectum adenocarcinoma; SARC, Sarcoma; SKCM, Skin Cutaneous Melanoma; STAD, Stomach adenocarcinoma; THCA, Thyroid carcinoma; THYM, Thymoma; UCEC. Pair-wise Pearson's correlation between PEBP1 and VIM were across for each of the 22 different types of cancer and their normal tissues in the TCGA. Significance is listed for each cancer type, for each biomarker with PEBP1.

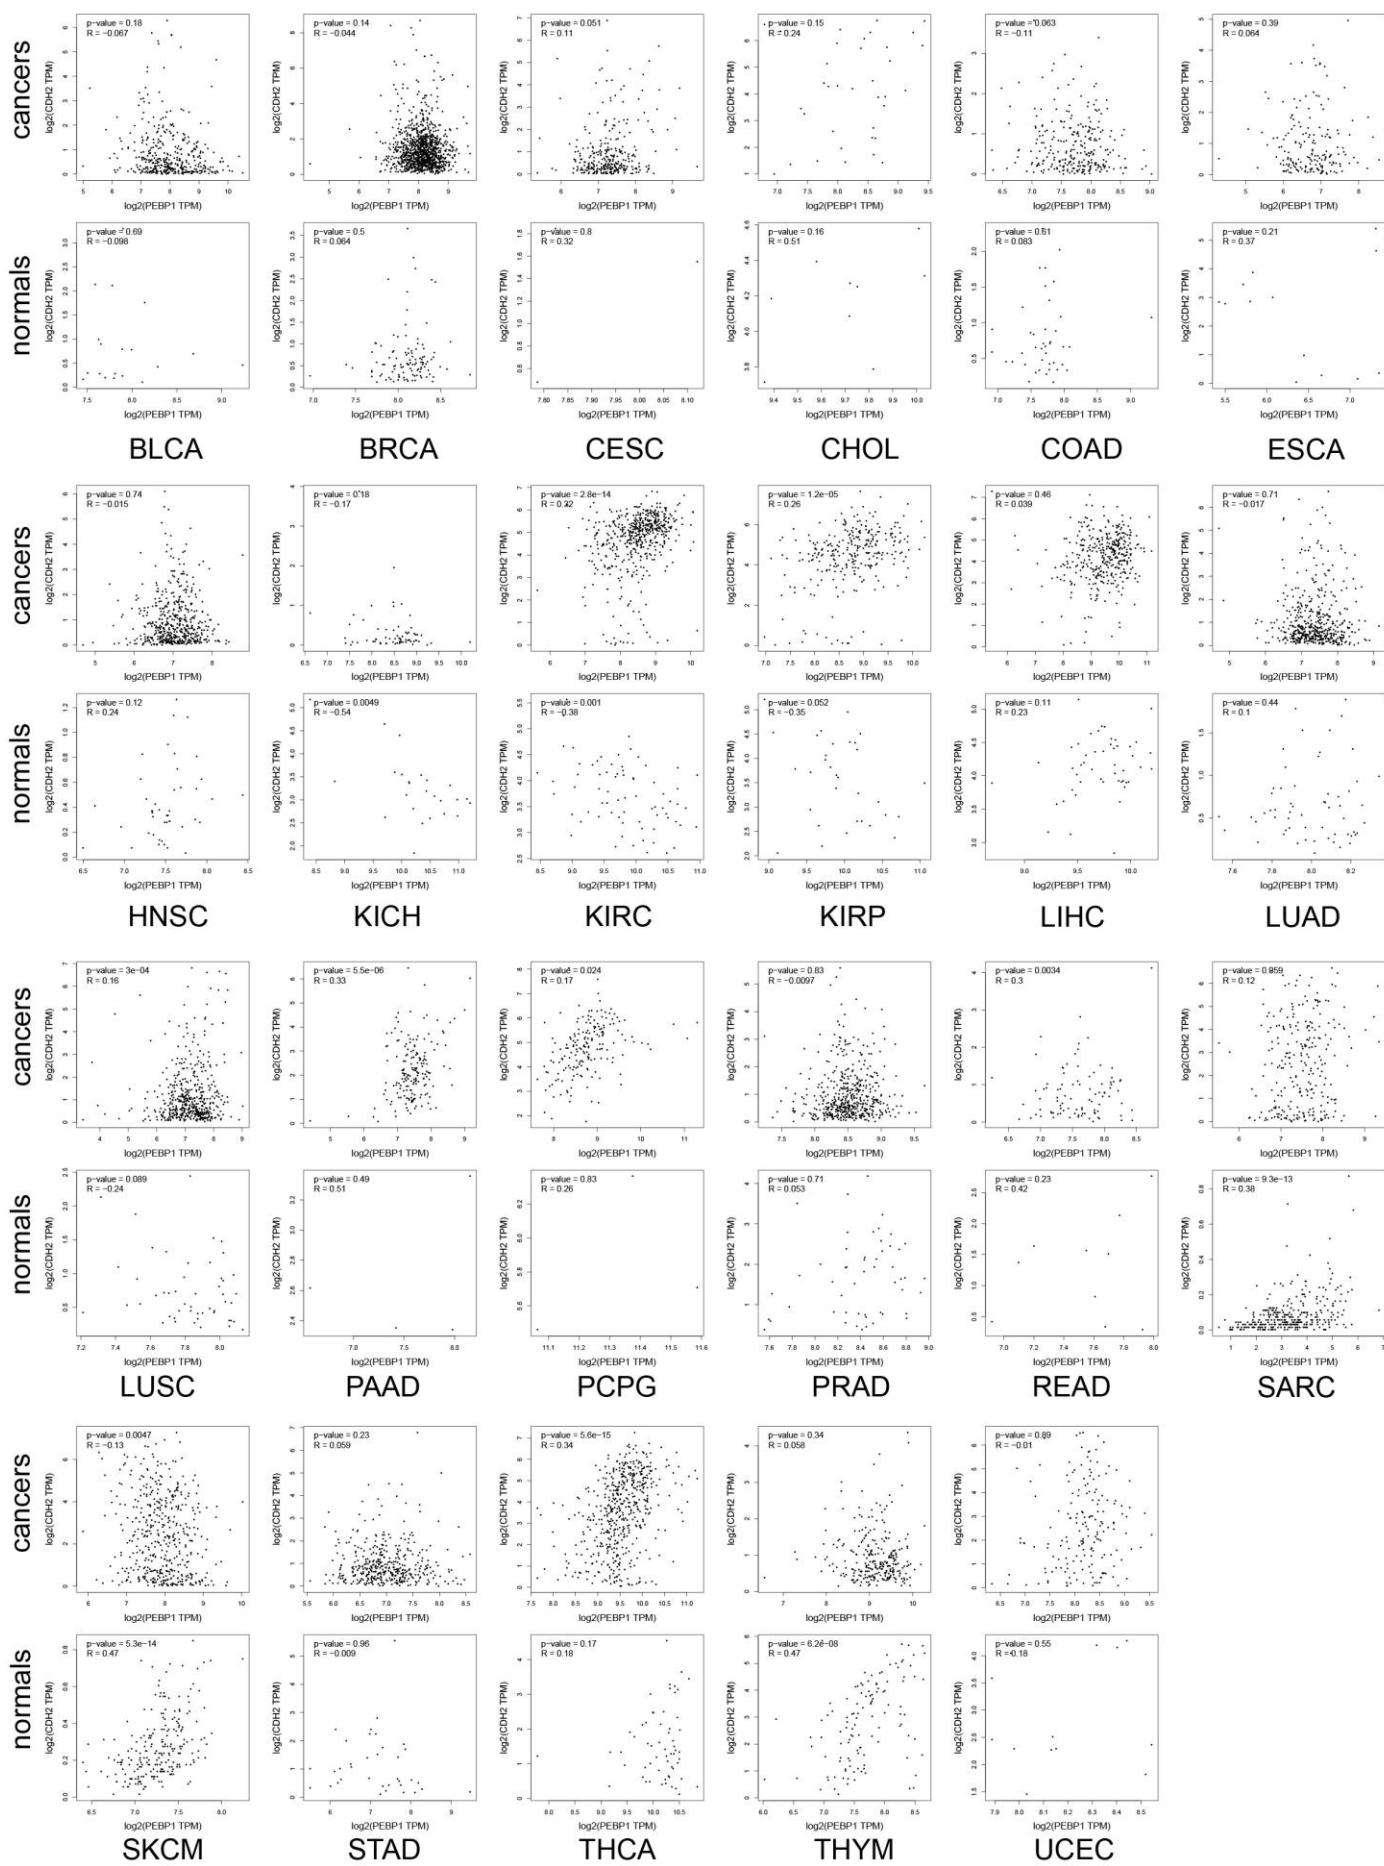

### **Supplementary Figure S3. RKIP vs CDH2 across normal and cancerous tissues.**

Gene expression ( $\log_2(\text{TPM})$ ) of the genes PEBP1 (RKIP), SNAIL1 (SNAIL), VIM, CDH1 (E-Cadherin), CDH2 (N-Cadherin), EPCAM, LAMA1 and LAMB1, across 22 different types of cancer in the Cancer Genome Atlas (TCGA). BLCA, Bladder Urothelial Carcinoma; BRCA, Breast invasive carcinoma; CESC, Cervical squamous cell carcinoma and endocervical adenocarcinoma; CHOL, Cholangiocarcinoma; COAD, Colon adenocarcinoma; ESCA, Esophageal carcinoma; HNSC, Head and Neck squamous cell carcinoma; KICH, Kidney Chromophobe; KIRC, Kidney renal clear cell carcinoma; KIRP, Kidney renal papillary cell carcinoma; LIHC, Liver hepatocellular carcinoma; LUAD, Lung adenocarcinoma; LUSC, Lung squamous cell carcinoma; PAAD, Pancreatic adenocarcinoma; PCPG, Pheochromocytoma and Paraganglioma; PRAD, Prostate adenocarcinoma; READ, Rectum adenocarcinoma; SARC, Sarcoma; SKCM, Skin Cutaneous Melanoma; STAD, Stomach adenocarcinoma; THCA, Thyroid carcinoma; THYM, Thymoma; UCEC. Pair-wise Pearson's correlation between PEBP1 and CDH2 were across for each of the 22 different types of cancer and their normal tissues in the TCGA. Significance is listed for each cancer type, for each biomarker with PEBP1.

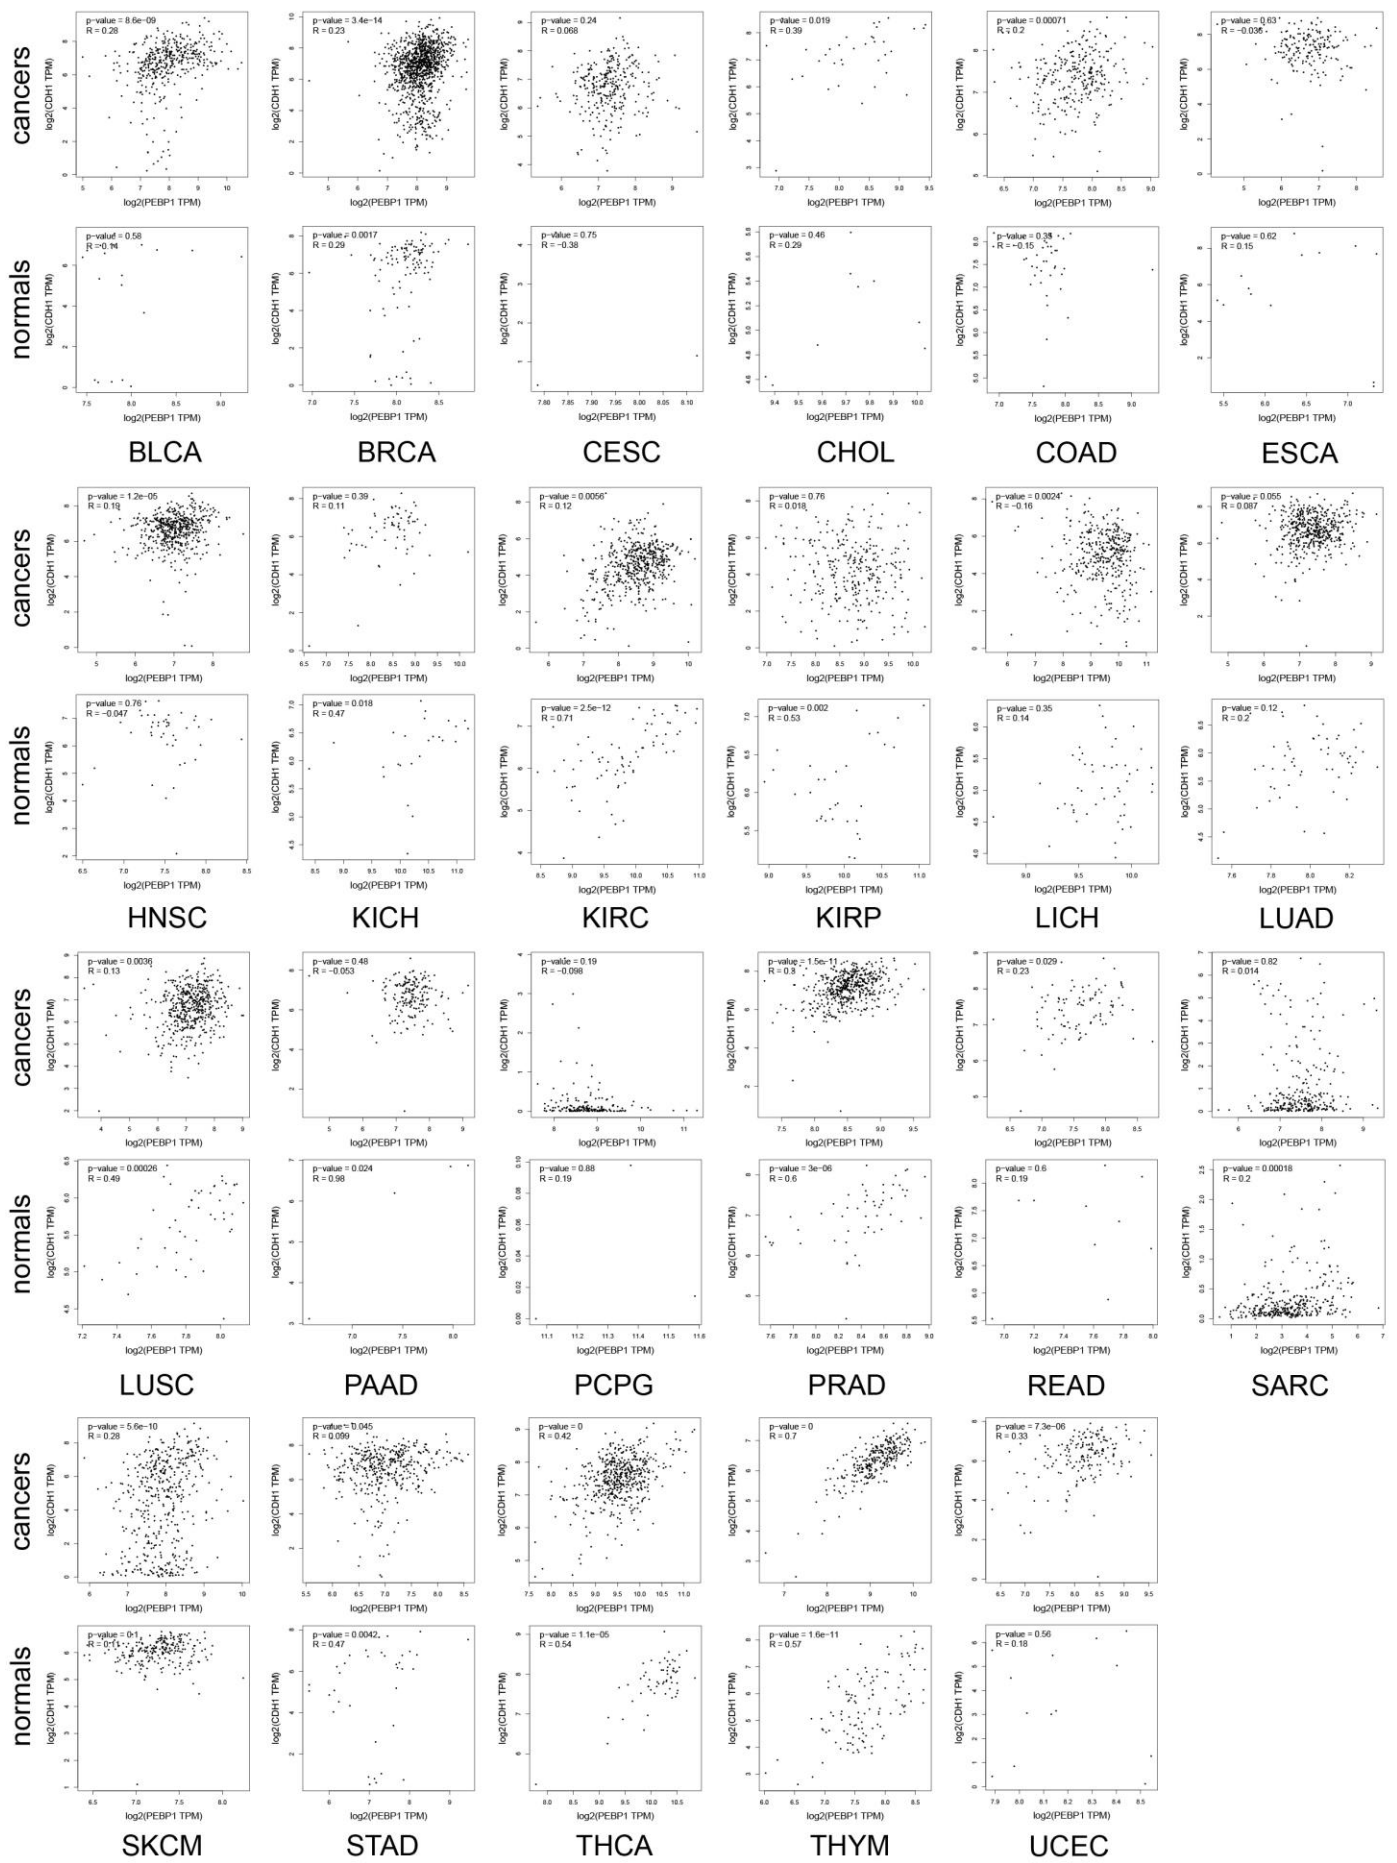



**Supplementary Figure S4. RKIP vs CDH1 across normal and cancerous tissues.**

Gene expression ( $\log_2(\text{TPM})$ ) of the genes PEBP1 (RKIP), SNAIL1 (SNAIL), VIM, CDH1 (E-Cadherin), CDH2 (N-Cadherin), EPCAM, LAMA1 and LAMB1, across 22 different types of cancer in the Cancer Genome Atlas (TCGA). BLCA, Bladder Urothelial Carcinoma; BRCA, Breast invasive carcinoma; CESC, Cervical squamous cell carcinoma and endocervical adenocarcinoma; CHOL, Cholangiocarcinoma; COAD, Colon adenocarcinoma; ESCA, Esophageal carcinoma; HNSC, Head and Neck squamous cell carcinoma; KICH, Kidney Chromophobe; KIRC, Kidney renal clear cell carcinoma; KIRP, Kidney renal papillary cell carcinoma; LIHC, Liver hepatocellular carcinoma; LUAD, Lung adenocarcinoma; LUSC, Lung squamous cell carcinoma; PAAD, Pancreatic adenocarcinoma; PCPG, Pheochromocytoma and Paraganglioma; PRAD, Prostate adenocarcinoma; READ, Rectum adenocarcinoma; SARC, Sarcoma; SKCM, Skin Cutaneous Melanoma; STAD, Stomach adenocarcinoma; THCA, Thyroid carcinoma; THYM, Thymoma; UCEC. Pair-wise Pearson's correlation between PEBP1 and CDH1 were across for each of the 22 different types of cancer and their normal tissues in the TCGA. Significance is listed for each cancer type, for each biomarker with PEBP1.

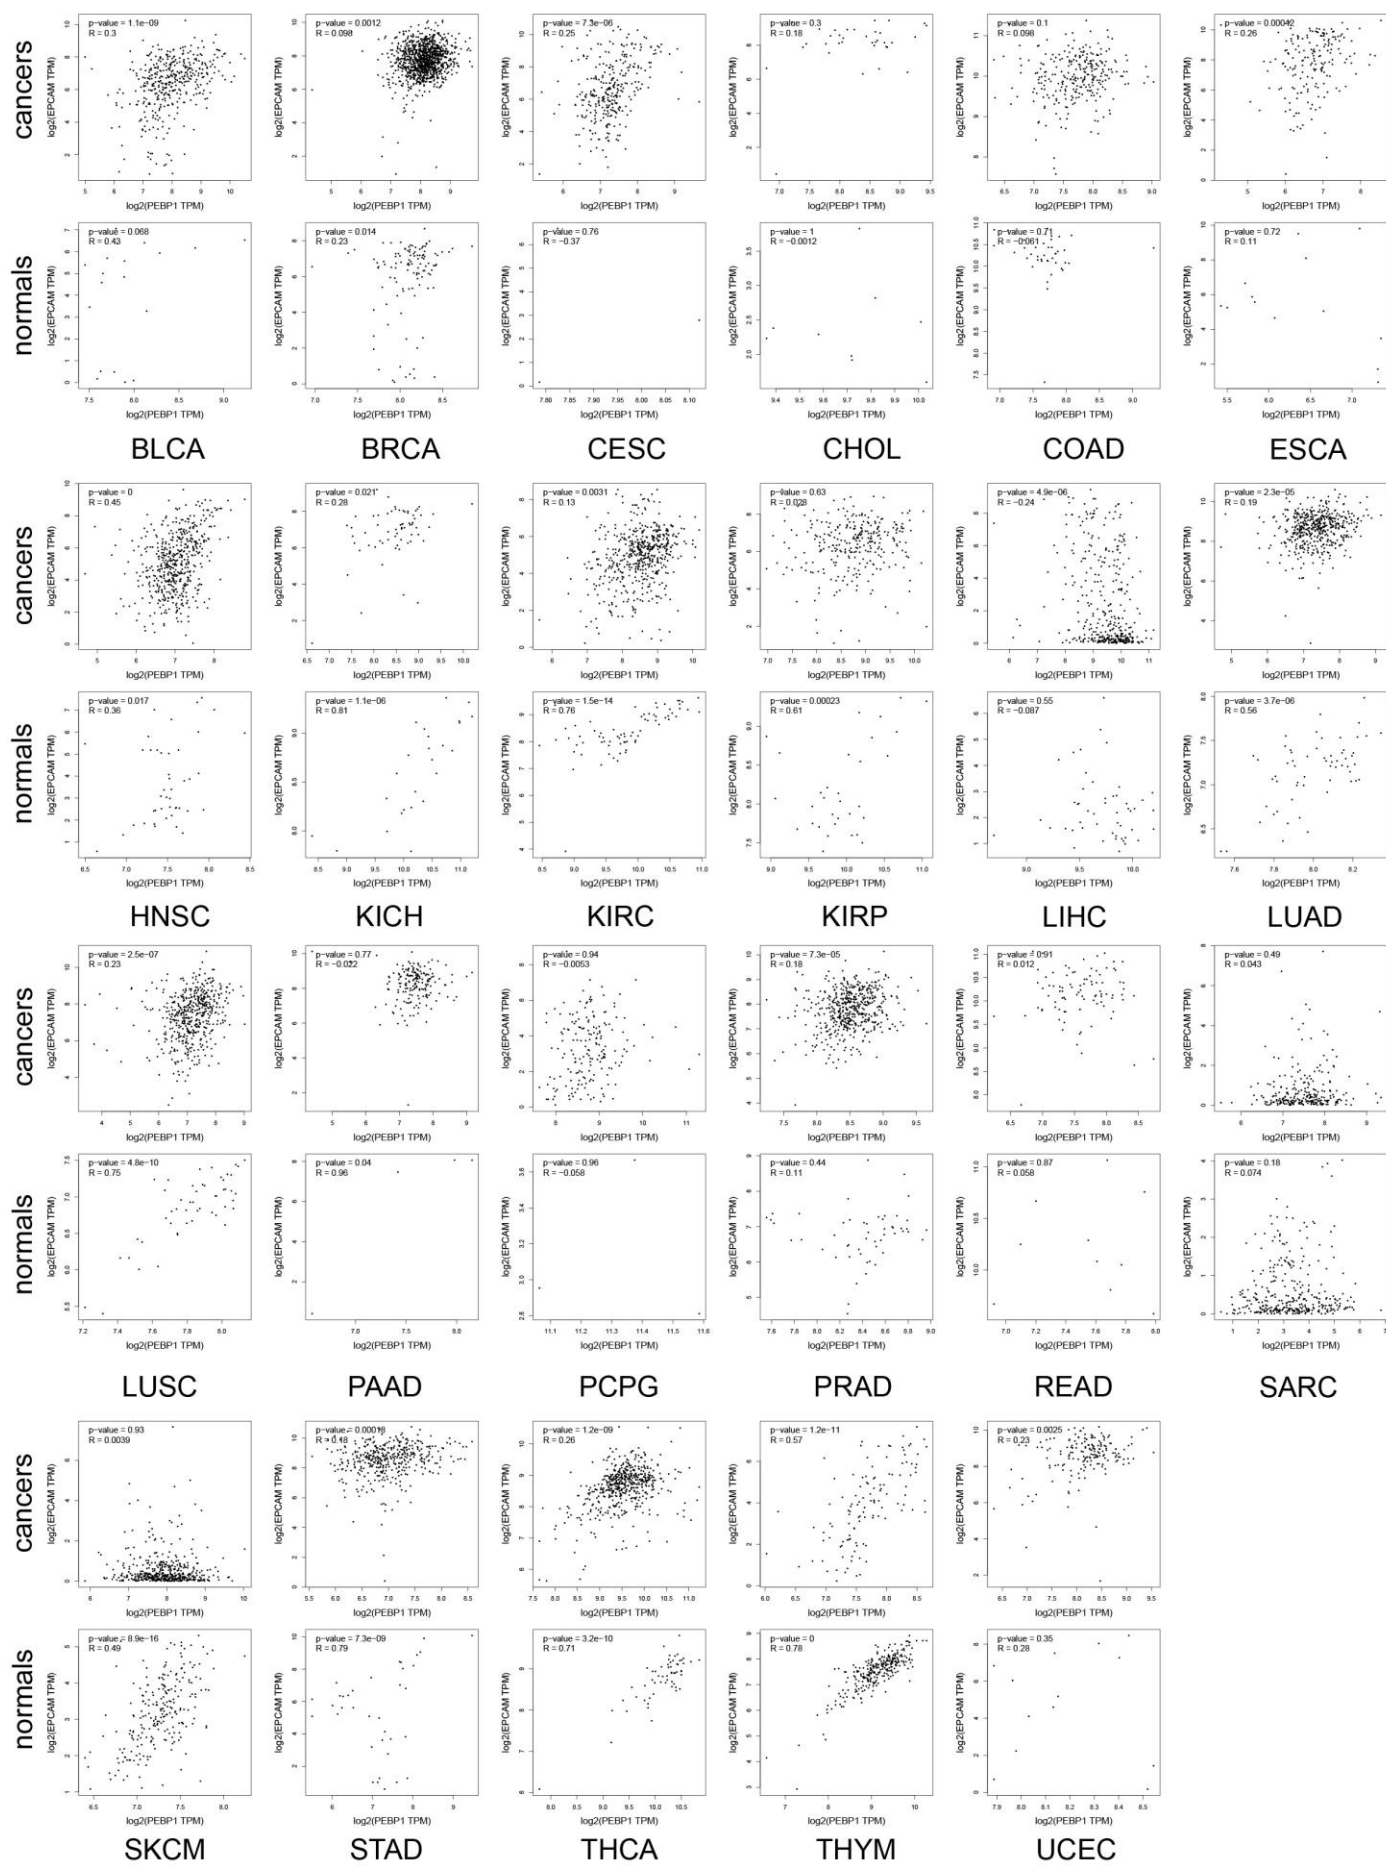

### **Supplementary Figure S5. RKIP vs EPCAM across normal and cancerous tissues.**

Gene expression ( $\log_2(\text{TPM})$ ) of the genes PEBP1 (RKIP), SNAIL1 (SNAIL), VIM, CDH1 (E-Cadherin), CDH2 (N-Cadherin), EPCAM, LAMA1 and LAMB1, across 22 different types of cancer in the Cancer Genome Atlas (TCGA). BLCA, Bladder Urothelial Carcinoma; BRCA, Breast invasive carcinoma; CESC, Cervical squamous cell carcinoma and endocervical adenocarcinoma; CHOL, Cholangiocarcinoma; COAD, Colon adenocarcinoma; ESCA, Esophageal carcinoma; HNSC, Head and Neck squamous cell carcinoma; KICH, Kidney Chromophobe; KIRC, Kidney renal clear cell carcinoma; KIRP, Kidney renal papillary cell carcinoma; LIHC, Liver hepatocellular carcinoma; LUAD, Lung adenocarcinoma; LUSC, Lung squamous cell carcinoma; PAAD, Pancreatic adenocarcinoma; PCPG, Pheochromocytoma and Paraganglioma; PRAD, Prostate adenocarcinoma; READ, Rectum adenocarcinoma; SARC, Sarcoma; SKCM, Skin Cutaneous Melanoma; STAD, Stomach adenocarcinoma; THCA, Thyroid carcinoma; THYM, Thymoma; UCEC. Pair-wise Pearson's correlation between PEBP1 and EPCAM were across for each of the 22 different types of cancer and their normal tissues in the TCGA. Significance is listed for each cancer type, for each biomarker with PEBP1.

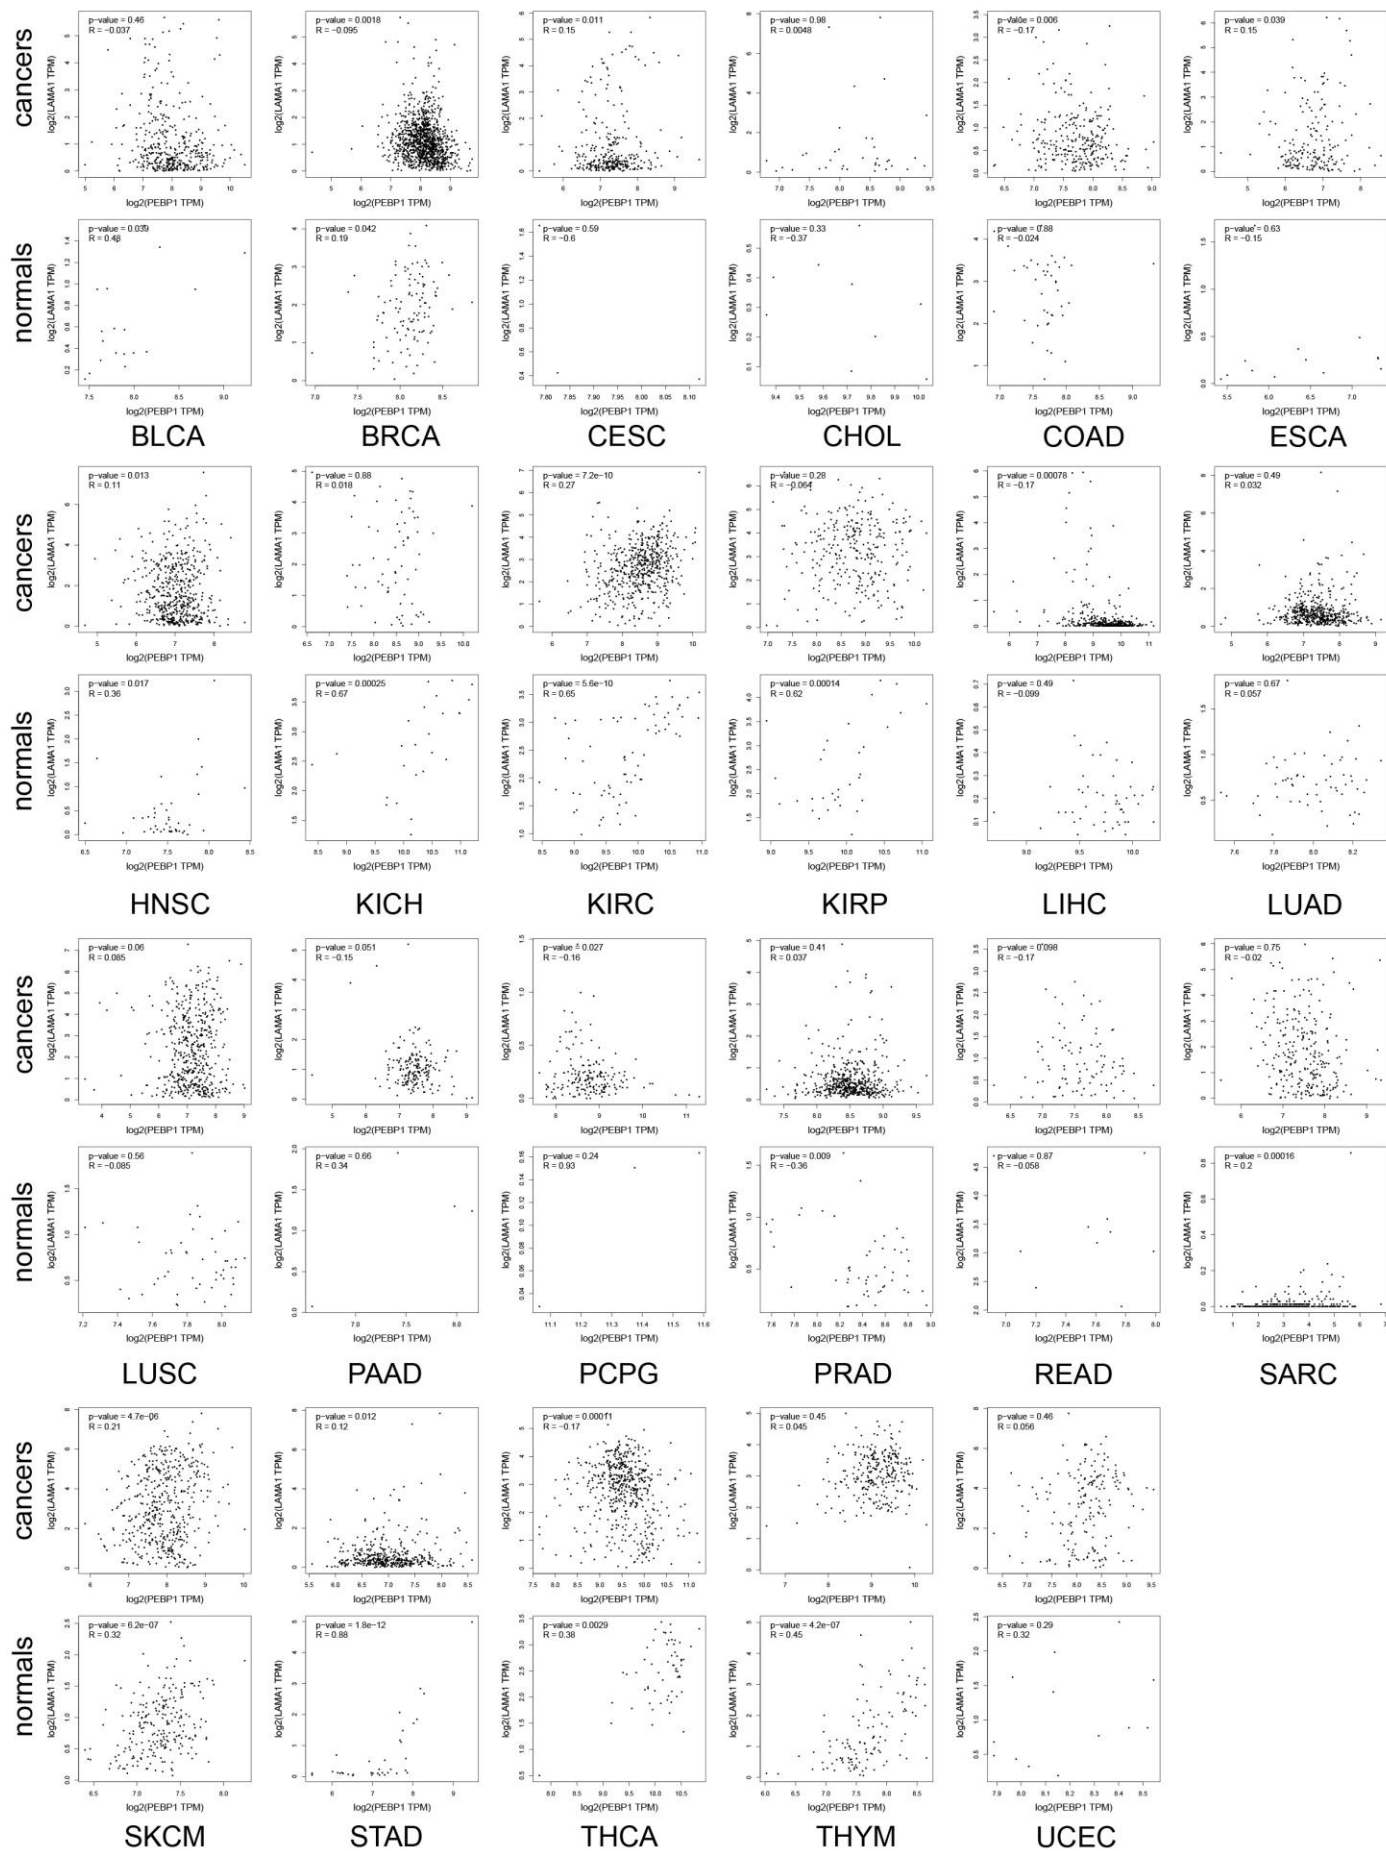

**Supplementary Figure S6. RKIP vs LAMA1 across normal and cancerous tissues.**

Gene expression ( $\log_2(\text{TPM})$ ) of the genes PEBP1 (RKIP), SNAIL1 (SNAIL), VIM, CDH1 (E-Cadherin), CDH2 (N-Cadherin), EPCAM, LAMA1 and LAMB1, across 22 different types of cancer in the Cancer Genome Atlas (TCGA). BLCA, Bladder Urothelial Carcinoma; BRCA, Breast invasive carcinoma; CESC, Cervical squamous cell carcinoma and endocervical adenocarcinoma; CHOL, Cholangiocarcinoma; COAD, Colon adenocarcinoma; ESCA, Esophageal carcinoma; HNSC, Head and Neck squamous cell carcinoma; KICH, Kidney Chromophobe; KIRC, Kidney renal clear cell carcinoma; KIRP, Kidney renal papillary cell carcinoma; LIHC, Liver hepatocellular carcinoma; LUAD, Lung adenocarcinoma; LUSC, Lung squamous cell carcinoma; PAAD, Pancreatic adenocarcinoma; PCPG, Pheochromocytoma and Paraganglioma; PRAD, Prostate adenocarcinoma; READ, Rectum adenocarcinoma; SARC, Sarcoma; SKCM, Skin Cutaneous Melanoma; STAD, Stomach adenocarcinoma; THCA, Thyroid carcinoma; THYM, Thymoma; UCEC. Pair-wise Pearson's correlation between PEBP1 and LAMA1 were across for each of the 22 different types of cancer and their normal tissues in the TCGA. Significance is listed for each cancer type, for each biomarker with PEBP1.

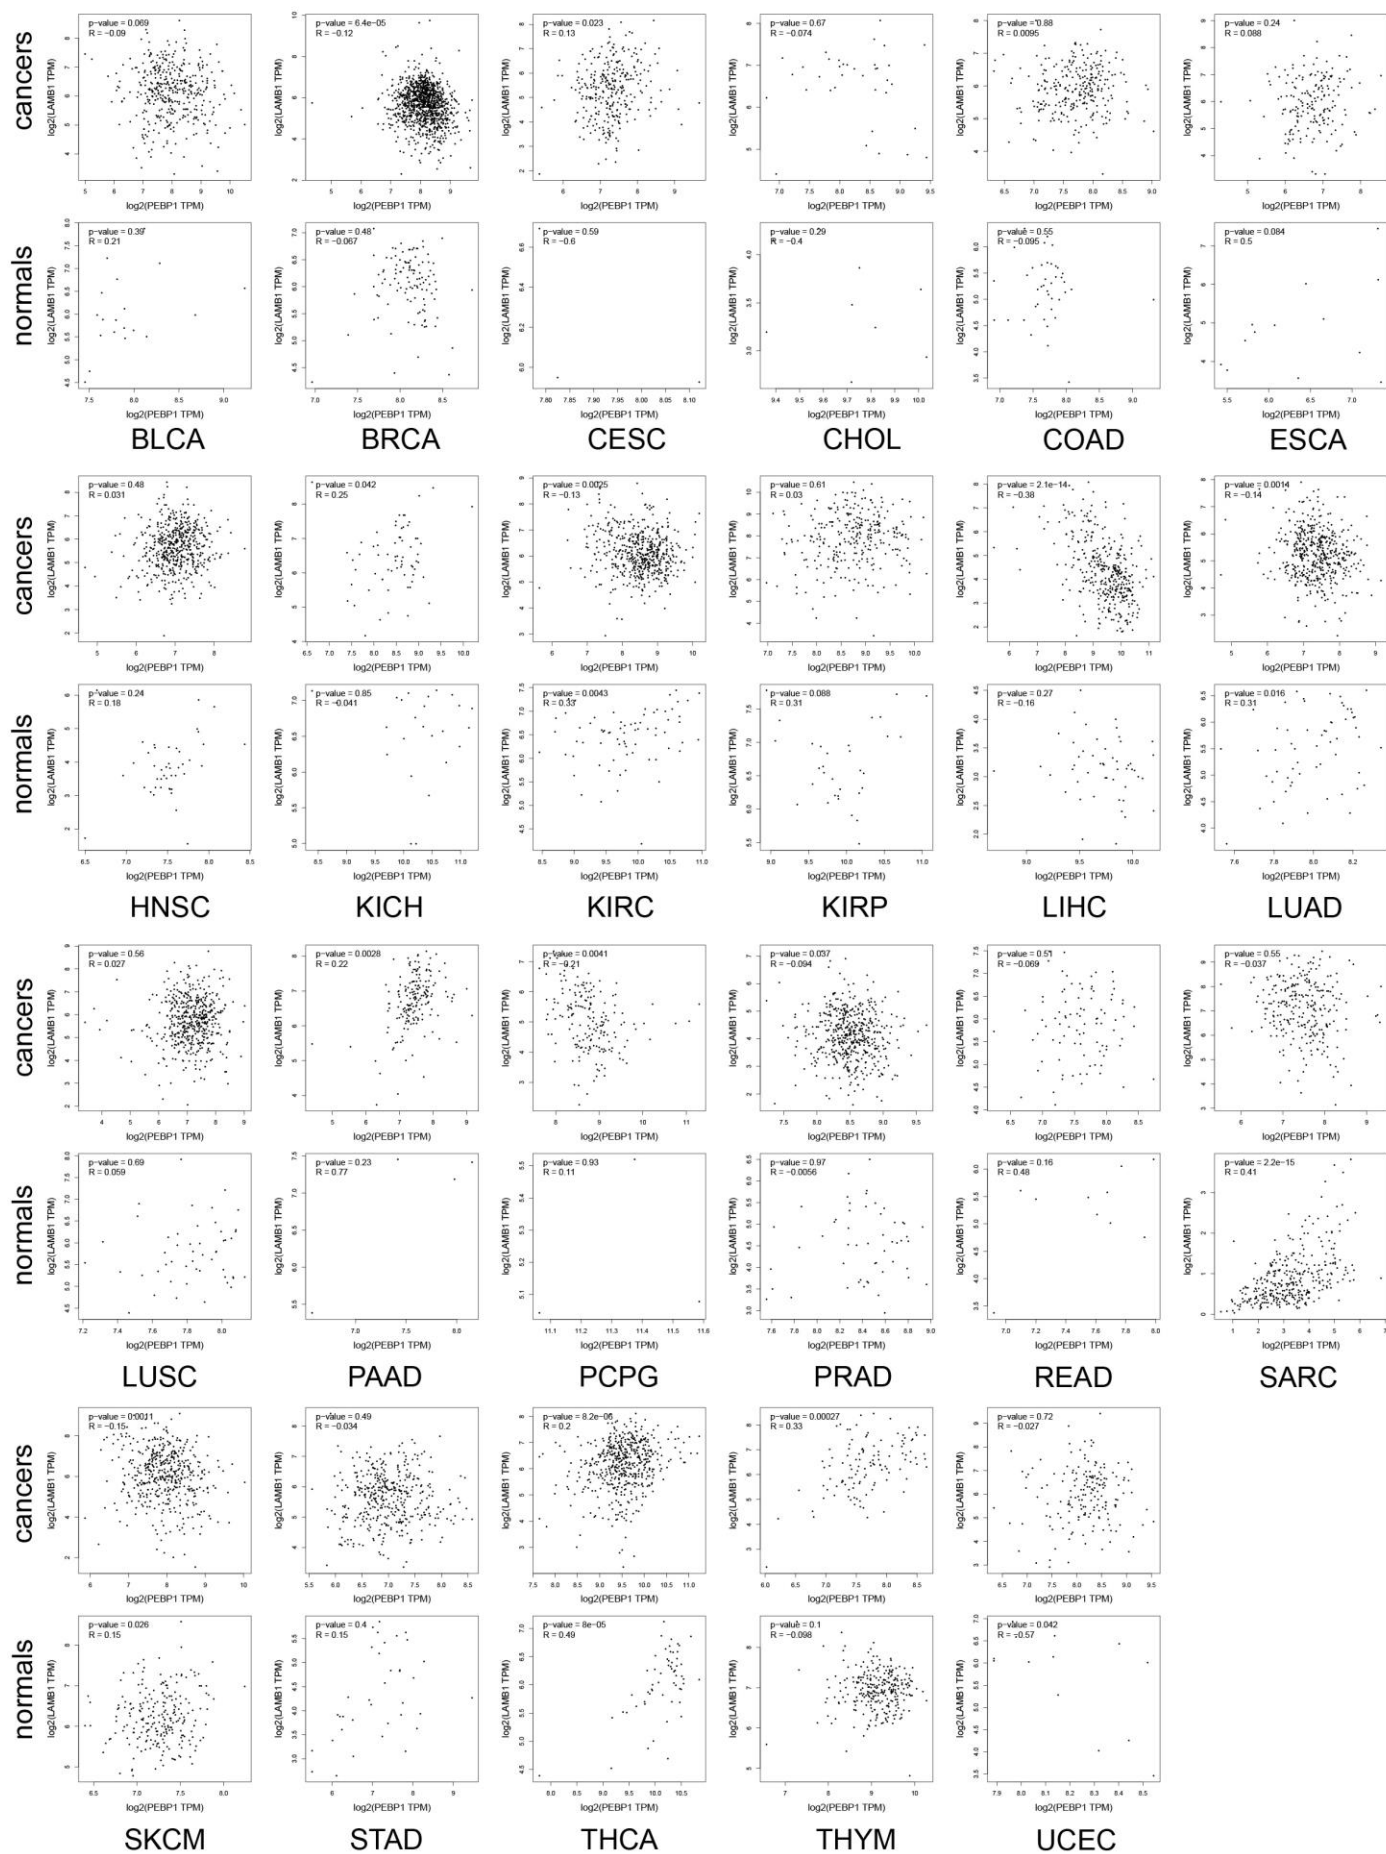

### **Supplementary Figure S7. RKIP vs LAMB1 across normal and cancerous tissues.**

Gene expression ( $\log_2(\text{TPM})$ ) of the genes PEBP1 (RKIP), SNAIL1 (SNAIL), VIM, CDH1 (E-Cadherin), CDH2 (N-Cadherin), EPCAM, LAMA1 and LAMB1, across 22 different types of cancer in the Cancer Genome Atlas (TCGA). BLCA, Bladder Urothelial Carcinoma; BRCA, Breast invasive carcinoma; CESC, Cervical squamous cell carcinoma and endocervical adenocarcinoma; CHOL, Cholangiocarcinoma; COAD, Colon adenocarcinoma; ESCA, Esophageal carcinoma; HNSC, Head and Neck squamous cell carcinoma; KICH, Kidney Chromophobe; KIRC, Kidney renal clear cell carcinoma; KIRP, Kidney renal papillary cell carcinoma; LIHC, Liver hepatocellular carcinoma; LUAD, Lung adenocarcinoma; LUSC, Lung squamous cell carcinoma; PAAD, Pancreatic adenocarcinoma; PCPG, Pheochromocytoma and Paraganglioma; PRAD, Prostate adenocarcinoma; READ, Rectum adenocarcinoma; SARC, Sarcoma; SKCM, Skin Cutaneous Melanoma; STAD, Stomach adenocarcinoma; THCA, Thyroid carcinoma; THYM, Thymoma; UCEC. Pair-wise Pearson's correlation between PEBP1 and LAMB1 were across for each of the 22 different types of cancer and their normal tissues in the TCGA. Significance is listed for each cancer type, for each biomarker with PEBP1.
